# Supplementary material for: Physical frailty and decline in general and specific cognitive abilities: the Lothian Birth Cohort 1936
Source: PubMed Central journal article supplement (PMC6993023; doi:10.1136/jech-2019-213280), 2019-11-05

Supplementary Figure 1: Model-implied ageing trajectories for each cognitive score, grouped by frailty status.

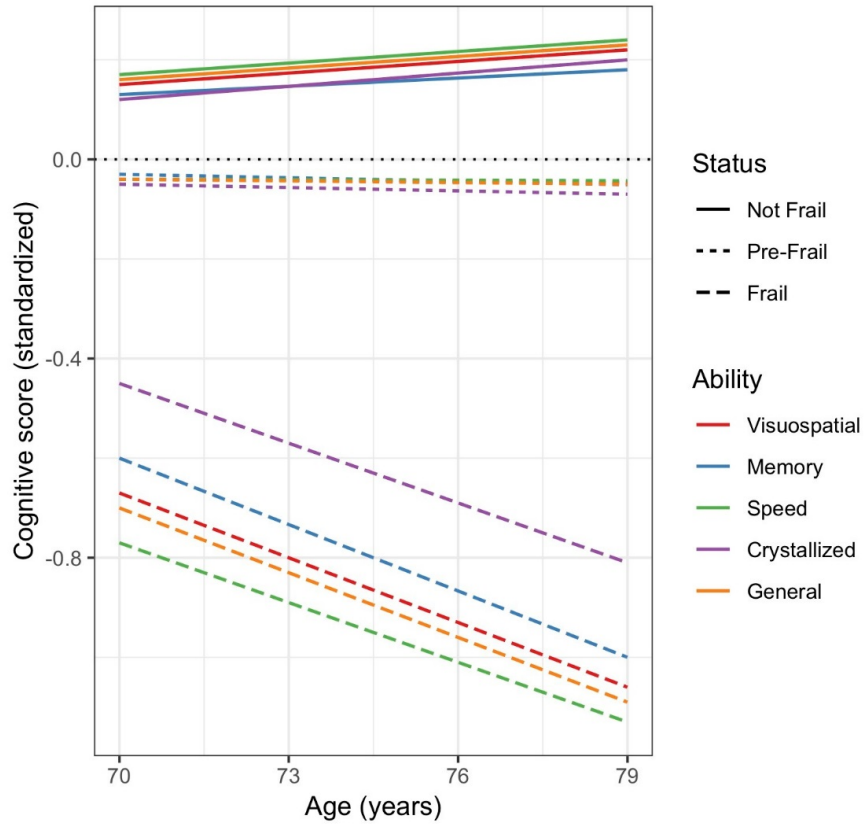

Supplement: jech-2019-213280supp001.pdf [file jech-2019-213280supp001.pdf]
