# Supplementary material for: Physical frailty and decline in general and specific cognitive abilities: the Lothian Birth Cohort 1936
Source: PubMed Central journal article supplement (PMC6993023; doi:10.1136/jech-2019-213280), 2019-11-05
Supplement: jech-2019-213280supp002.pdf [file jech-2019-213280supp002.pdf]

**Supplementary Table 1: Descriptive statistics for each cognitive test at each wave of the Lothian Birth Cohort 1936 study**

| Test                        | Wave 1<br>(70 years) |      | Wave 2<br>(73 years) |     | Wave 3<br>(76 years) |     | Wave 4<br>(79 years) |     |
|-----------------------------|----------------------|------|----------------------|-----|----------------------|-----|----------------------|-----|
|                             | Mean<br>(SD)         | N    | Mean<br>(SD)         | N   | Mean<br>(SD)         | N   | Mean<br>(SD)         | N   |
| Matrix reasoning            | 13.49<br>(5.13)      | 1086 | 13.17<br>(4.96)      | 863 | 13.04<br>(4.91)      | 689 | 12.90<br>(5.03)      | 535 |
| Block design                | 33.79<br>(10.32)     | 1085 | 33.64<br>(10.08)     | 864 | 32.18<br>(9.95)      | 691 | 31.20<br>(9.63)      | 535 |
| Spatial span                | 7.36<br>(1.42)       | 1084 | 7.35<br>(1.38)       | 861 | 7.31 (1.36)          | 690 | 7.07<br>(1.36)       | 536 |
| Logical memory              | 71.46<br>(17.96)     | 1087 | 74.30<br>(17.88)     | 864 | 74.58<br>(19.20)     | 688 | 72.71<br>(20.39)     | 542 |
| Verbal paired associates    | 26.44<br>(9.13)      | 1050 | 27.18<br>(9.46)      | 843 | 26.41<br>(9.56)      | 663 | 27.14<br>(9.55)      | 497 |
| Digit span backwards        | 7.73<br>(2.26)       | 1090 | 7.81<br>(2.29)       | 866 | 7.77<br>(2.37)       | 695 | 7.56<br>(2.18)       | 548 |
| NART                        | 34.48<br>(8.15)      | 1089 | 34.38<br>(8.18)      | 864 | 35.02<br>(8.03)      | 695 | 35.59<br>(8.19)      | 546 |
| WTAR                        | 41.02<br>(7.17)      | 1089 | 41.01<br>(6.97)      | 864 | 41.09<br>(7.02)      | 694 | 41.63<br>(7.03)      | 546 |
| Verbal                      | 42.42<br>(12.54)     | 1087 | 43.18<br>(12.94)     | 865 | 42.90<br>(12.76)     | 696 | 43.61<br>(13.33)     | 547 |
| Digit-symbol substitution   | 56.60<br>(12.93)     | 1086 | 56.40<br>(12.31)     | 862 | 53.81<br>(12.93)     | 685 | 49.70<br>(38.06)     | 535 |
| Symbol search               | 24.71<br>(6.39)      | 1086 | 24.61<br>(6.18)      | 862 | 24.60<br>(6.46)      | 687 | 19.25<br>(56.65)     | 529 |
| Inspection time             | 112.14<br>(11.00)    | 1041 | 111.22<br>(11.79)    | 838 | 110.14<br>(12.55)    | 654 | 105.06<br>(43.14)    | 465 |
| Choice reaction time (sec.) | 642.11<br>(85.78)    | 1084 | 649.27<br>(89.84)    | 865 | 678.84<br>(102.75)   | 685 | 706.03<br>(113.61)   | 543 |

Note: Ages are rounded to the nearest year
