# Supplementary material for: Physical frailty and decline in general and specific cognitive abilities: the Lothian Birth Cohort 1936
Source: PubMed Central journal article supplement (PMC6993023; doi:10.1136/jech-2019-213280), 2019-11-05
Supplement: jech-2019-213280supp003.pdf [file jech-2019-213280supp003.pdf]

**Supplementary table 2: Descriptive cognitive data for participants who completed all four waves of the study (maximal N = 539)**

| Test                      | Wave 1<br>(70 years) |     | Wave 2<br>(73 years) |     | Wave 3<br>(76 years) |     | Wave 4<br>(79 years) |     |
|---------------------------|----------------------|-----|----------------------|-----|----------------------|-----|----------------------|-----|
|                           | Mean<br>(SD)         | N   | Mean<br>(SD)         | N   | Mean<br>(SD)         | N   | Mean<br>(SD)         | N   |
| Matrix reasoning          | 14.46<br>(5.02)      | 538 | 13.91<br>(4.89)      | 537 | 13.33<br>(4.91)      | 532 | 12.97<br>(5.02)      | 524 |
| Block design              | 35.67<br>(10.13)     | 537 | 34.70<br>(10.13)     | 538 | 32.72<br>(9.79)      | 534 | 31.32<br>(9.66)      | 524 |
| Spatial span              | 7.54<br>(1.37)       | 536 | 7.46<br>(1.34)       | 535 | 7.41<br>(1.34)       | 533 | 7.08<br>(1.37)       | 525 |
| Logical memory            | 74.43<br>(16.87)     | 539 | 76.30<br>(16.93)     | 539 | 75.78<br>(18.45)     | 535 | 73.02<br>(20.30)     | 531 |
| Verbal paired associates  | 27.88<br>(8.53)      | 526 | 28.45<br>(9.04)      | 527 | 27.29<br>(9.25)      | 515 | 27.31<br>(9.44)      | 487 |
| Digit span backwards      | 8.03<br>(2.37)       | 539 | 8.01<br>(2.32)       | 539 | 7.91<br>(2.41)       | 537 | 7.58<br>(2.19)       | 537 |
| NART                      | 35.60<br>(7.97)      | 538 | 35.23<br>(7.99)      | 537 | 35.60<br>(7.95)      | 537 | 35.70<br>(8.10)      | 535 |
| WTAR                      | 41.90<br>(6.95)      | 538 | 41.76<br>(6.61)      | 537 | 41.56<br>(6.93)      | 537 | 41.72<br>(6.97)      | 535 |
| Verbal fluency            | 43.60<br>(12.77)     | 538 | 44.37<br>(12.97)     | 538 | 43.75<br>(12.72)     | 538 | 43.72<br>(13.32)     | 536 |
| Digit-symbol substitution | 59.00<br>(12.40)     | 536 | 58.37<br>(11.98)     | 536 | 55.43<br>(12.27)     | 527 | 51.38<br>(13.00)     | 524 |
| Symbol search             | 25.64<br>(6.58)      | 538 | 25.49<br>(5.92)      | 536 | 25.26<br>(6.26)      | 531 | 22.71<br>(6.73)      | 518 |
| Inspection time           | 113.43<br>(10.52)    | 524 | 112.26<br>(11.65)    | 529 | 110.97<br>(11.83)    | 516 | 107.05<br>(13.60)    | 458 |
| Choice reaction time (ms) | 626.72<br>(79.20)    | 538 | 636.94<br>(82.66)    | 538 | 668.61<br>(94.60)    | 528 | 704.79<br>(113.95)   | 532 |
